# Supplementary material
Source: PubMed Central journal article supplement (PMC6009834)

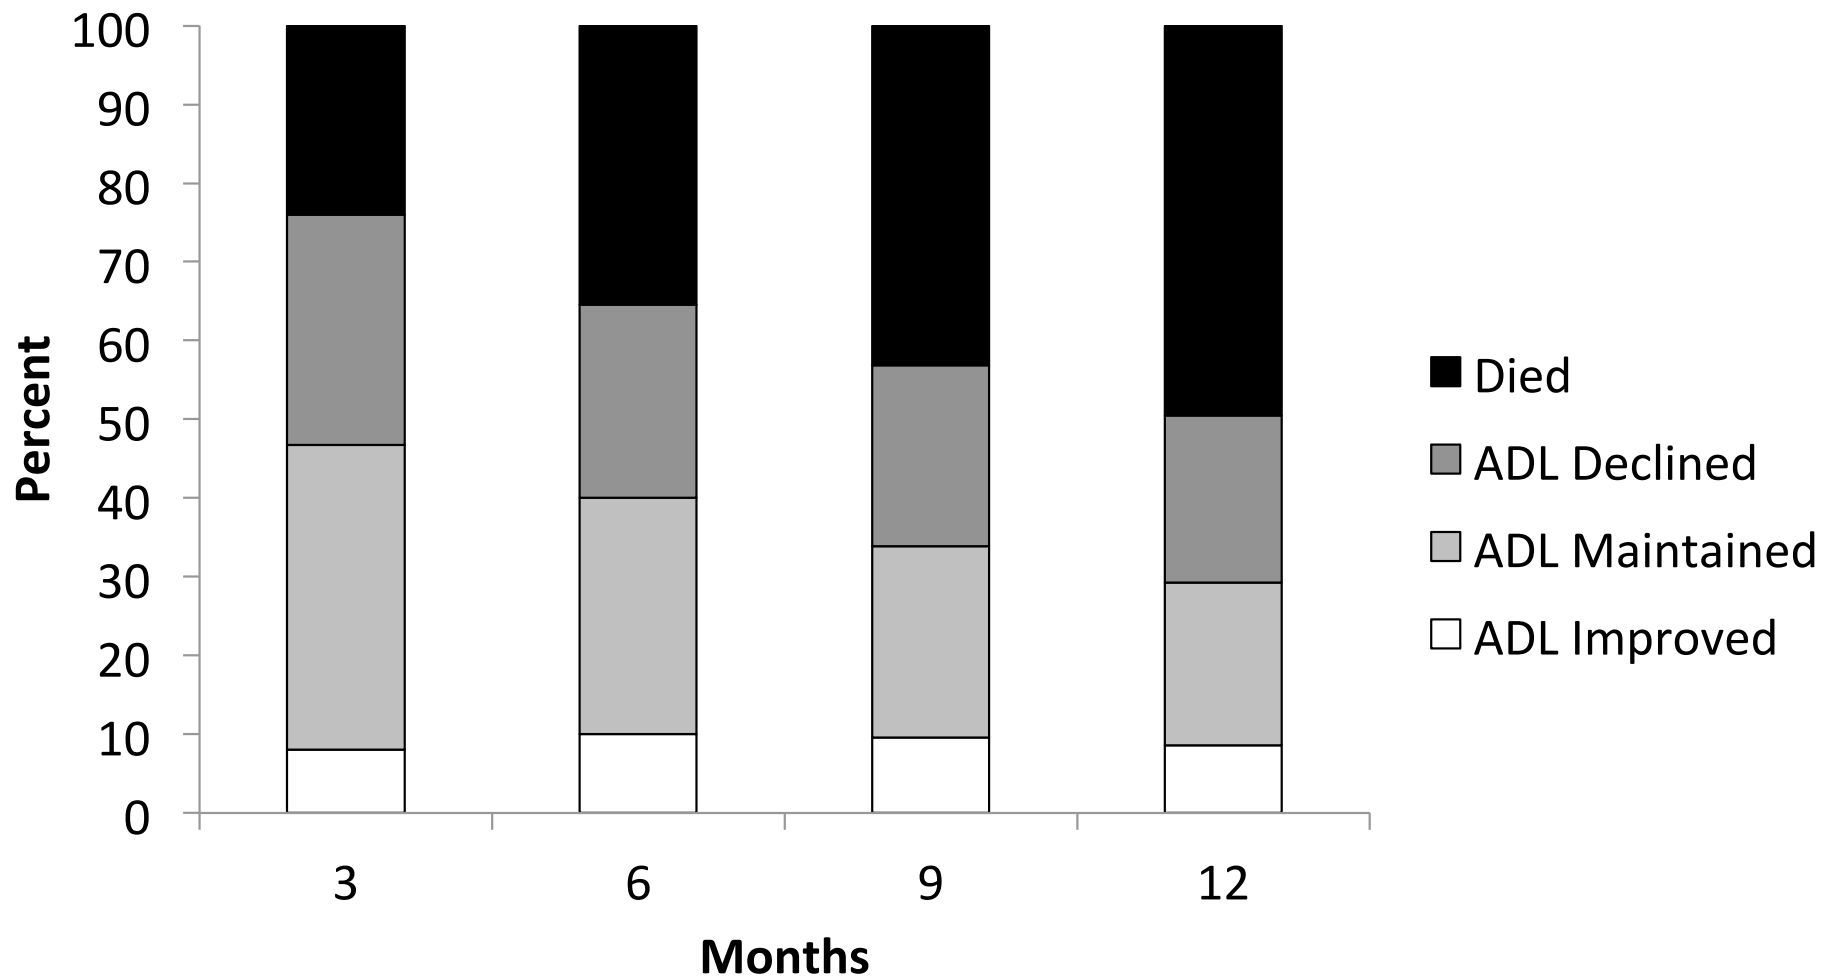

Supplement: NIHMS948387-supplement-Supp_FigS1.pdf [file NIHMS948387-supplement-Supp_FigS1.pdf]
